# Supplementary material for: Novel Chimeric Multiepitope Vaccine for Streptococcosis Disease in Nile Tilapia (Oreochromis niloticus Linn.)
Source: PubMed Central journal article supplement (PMC6969146; doi:10.1038/s41598-019-57283-0), 2020-01-17
Supplement: 41598_2019_57283_MOESM1_ESM.pdf [file 41598_2019_57283_MOESM1_ESM.pdf]

1 **Novel Chimeric-multiple epitope Vaccine for Streptococcosis Disease in Nile**  
2 **Tilapia (*Oreochromis niloticus*, Linn.)**

3 Ansaya Pumchan<sup>1</sup>, Sucheewin Krobthong<sup>2</sup>, Sittiruk Roytrakul<sup>2</sup>, Orathai Sawatdichaikul<sup>3</sup>,

4 Hidehiro Kondo<sup>4</sup>, Ikuo Hirono<sup>4</sup>, Nontawith Areechon<sup>5</sup>, Sasimanas Unajak<sup>1,6,7\*</sup>

5 **Supplementary information**

6  
7  
8  
9  
10  
11  
12  
13  
14  
15  
16  
17  
18  
19  
20  
21  
22  
23  
24  
25  
26  
27  
28  
29

30 **S1: Venn-diagram representing immunogenic protein identified by LC-MS/MS.** The  
31 number in diagram represent immunogenic proteins uniquely identified in each serotype, and  
32 the number in the corresponding overlapping areas represent of differentially expressed  
33 immunogenic proteins that are sharing in both serotypes that given.

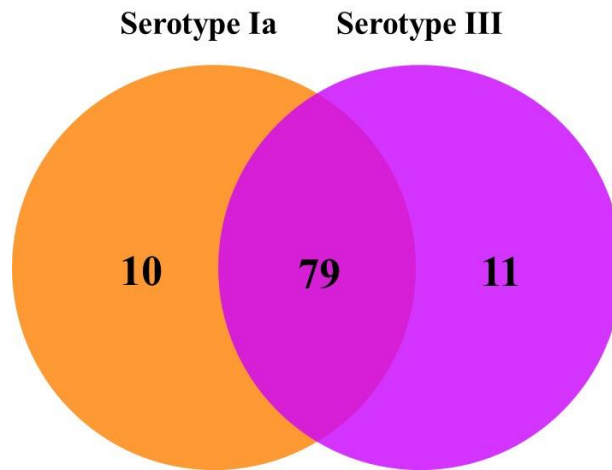

34

35 **S2: List of immunogenic proteins that found in both serotype Ia and III and the unique immunogenic proteins.**

| Immunogenic protein name                                                                                                            | Peptides<br>[No.] | MW<br>[kDa] | Relative intensity |                 |
|-------------------------------------------------------------------------------------------------------------------------------------|-------------------|-------------|--------------------|-----------------|
|                                                                                                                                     |                   |             | Serotype<br>Ia     | Serotype<br>III |
| Cell-division-associated, ABC-transporter-like signaling protein FtsE                                                               | 5                 | 26.094      | 11.20762           | 17.19422        |
| 2-halo alkanolic acid dehalogenase (EC3.8.1.2)                                                                                      | 3                 | 34.945      | 12.03435           | 11.62872        |
| LPXTG cell wall anchor domain-containing protein_1                                                                                  | 3                 | 29.623      | 12.38775           | 15.57483        |
| Chromosome (plasmid) partitioning protein ParB                                                                                      | 3                 | 29.237      | 12.50695           | 15.45677        |
| Protein translocase subunit SecA                                                                                                    | 4                 | 95.312      | 12.90032           | 16.45034        |
| Integrase                                                                                                                           | 4                 | 44.586      | 13.07433           | 13.50407        |
| Bis-ABC ATPase Uup                                                                                                                  | 4                 | 71.088      | 13.11387           | 16.32592        |
| Glycosyltransferase, group2 family; dTDP-rhamnosyltransferase RfbF (EC2.-.-.)                                                       | 3                 | 32.954      | 13.22405           | 15.86361        |
| Tellurite resistance protein                                                                                                        | 3                 | 46.19       | 13.37205           | 14.07062        |
| LPXTG cell wall anchor domain-containing protein_2                                                                                  | 3                 | 21.008      | 13.39178           | 15.47757        |
| LPXTG cell wall anchor domain-containing protein_3                                                                                  | 3                 | 20.367      | 13.57648           | 13.76911        |
| Guanosine-3',5'-bis (diphosphate) 3'-pyrophosphohydrolase (EC3.1.7.2)<br>/GTP pyrophosphokinase (EC2.7.6.5), (p)ppGpp synthetase II | 4                 | 84.207      | 13.62297           | 13.89159        |
| Internalin-like protein (LPXTGmotif)                                                                                                | 4                 | 160.49      | 13.64149           | 14.71644        |
| Transcriptional regulator ArcR essential for anaerobic expression of the ADI pathway, Crp/Fnr family                                | 4                 | 26.766      | 13.64442           | 16.57865        |
| Transposase TnpA_1                                                                                                                  | 3                 | 29.581      | 13.84539           | 15.34976        |

|                                                                                                                                                          |   |        |          |          |
|----------------------------------------------------------------------------------------------------------------------------------------------------------|---|--------|----------|----------|
| Transcriptional regulator, Crp/Fnr family                                                                                                                | 3 | 25.735 | 13.86157 | 12.5886  |
| 1,4-alpha-glucan (glycogen) branching enzyme, GH-13-type (EC2.4.1.18)                                                                                    | 3 | 73.341 | 13.87546 | 15.70852 |
| ABC transporter, substrate-binding protein (cluster3,basicaa/glutamine/opines)<br>/ABC transporter, permease protein (cluster3,basicaa/glutamine/opines) | 4 | 57.132 | 14.19499 | 13.63719 |
| Ribosomal small subunit pseudouridine synthase A (EC5.4.99.19)                                                                                           | 4 | 27.095 | 14.37518 | 16.66025 |
| Cell wall surface anchor family protein_1                                                                                                                | 3 | 52.934 | 14.43365 | 14.53473 |
| Hydrolase, HAD superfamily                                                                                                                               | 3 | 51.776 | 14.43495 | 13.84343 |
| Cell wall surface anchor family protein_2                                                                                                                | 4 | 56.357 | 14.46289 | 13.86041 |
| Cell envelope-associated transcriptional attenuator LytR-CpsA-Psr, subfamily F1                                                                          | 3 | 52.55  | 14.52203 | 15.5966  |
| Maltodextrin ABC transporter, ATP-binding protein MsmX                                                                                                   | 4 | 42.094 | 14.57359 | 15.07707 |
| SSU ribosomal protein S18 p@SSU ribosomal protein S18p, zinc-independent                                                                                 | 3 | 9.2196 | 14.72345 | 15.22129 |
| Thioesterase                                                                                                                                             | 3 | 14.417 | 14.78361 | 13.47459 |
| Iron-sulfur cluster assembly protein SufD                                                                                                                | 4 | 46.506 | 14.83185 | 17.53359 |
| LPXTG cell wall anchor domain-containing protein_4                                                                                                       | 7 | 59.946 | 15.09816 | 13.536   |
| CRISPR-associated protein,Csd2/Csh2 family                                                                                                               | 3 | 31.849 | 15.13121 | 15.43476 |
| LPXTG cell wall anchor domain-containing protein_5                                                                                                       | 4 | 99.573 | 15.19825 | 14.82038 |
| Retron-type RNA-directed DNA polymerase (EC2.7.7.49)                                                                                                     | 4 | 49.297 | 15.49713 | 13.7195  |
| Ribonucleotide reductase of class Ib (aerobic), betasubunit (EC1.17.4.1)                                                                                 | 4 | 36.919 | 15.50925 | 15.88617 |
| Negative transcriptional regulator-copper transport operon                                                                                               | 4 | 15.748 | 15.77213 | 12.78326 |
| Site-specific recombinase                                                                                                                                | 3 | 61.009 | 16.00494 | 18.6631  |
| Phosphoribosyl aminoimidazole-succino carboxamide synthase (EC6.3.2.6)                                                                                   | 3 | 26.982 | 16.05059 | 15.40015 |
| Cyclic-di-AMP phosphodiesterase GdpP                                                                                                                     | 5 | 73.978 | 16.0955  | 15.91868 |

|                                                                                                |   |        |          |          |
|------------------------------------------------------------------------------------------------|---|--------|----------|----------|
| LPXTG cell wall anchor domain-containing protein_6                                             | 3 | 48.939 | 16.09583 | 16.98348 |
| Pseudo uridylylate synthases, 23S RNA-specific                                                 | 3 | 37.598 | 16.21176 | 17.22091 |
| Tellurite methyltransferase (EC2.1.1.265)                                                      | 3 | 33.042 | 16.28452 | 14.19098 |
| 5'-nucleotidase family protein in cluster with NagD-like phosphatase                           | 3 | 50.68  | 16.32917 | 16.80133 |
| Cell surface protein_1                                                                         | 6 | 118.03 | 16.33858 | 17.08701 |
| Cell wall surface anchor family protein_3                                                      | 3 | 54.362 | 16.34676 | 14.6557  |
| Cell wall surface anchor family protein, FPXTG motif_1                                         | 7 | 100.95 | 16.43554 | 15.24911 |
| ABC transporter, substrate-binding protein (cluster3,basicaa/glutamine/opines)                 | 3 | 28.947 | 16.5323  | 17.37382 |
| Peptide chain release factor 1                                                                 | 3 | 40.598 | 16.59393 | 15.38637 |
| GTP-binding protein Era                                                                        | 3 | 34.206 | 16.61137 | 17.17602 |
| Acetyltransferase                                                                              | 3 | 21.044 | 16.69493 | 13.44773 |
| Glutamyl-tRNA synthetase (EC6.1.1.17) @Glutamyl-tRNA (Gln) synthetase (EC6.1.1.24)             | 3 | 55.555 | 16.72401 | 15.30317 |
| RibonucleaseJ1 (endonucleaseand-5'-exonuclease)                                                | 4 | 60.925 | 16.89451 | 16.04778 |
| Phosphate regulon sensor protein PhoR (SphS) (EC2.7.13.3)                                      | 3 | 65.533 | 16.92555 | 12.53304 |
| 5-methyltetrahydropteroyltriglutamate—homocysteine methyltransferase (EC2.1.1.14)              | 3 | 84.66  | 16.95697 | 16.30217 |
| Surface antigen-related protein                                                                | 4 | 60.155 | 16.96229 | 18.65868 |
| Accessory secretory protein Asp1                                                               | 4 | 60.428 | 17.04025 | 12.78060 |
| Alcohol dehydrogenase (EC1.1.1.1)                                                              | 3 | 35.443 | 17.17543 | 17.89853 |
| Cell wall surface anchor family protein_4                                                      | 4 | 54.36  | 17.18621 | 16.24068 |
| Cell wall surface anchor family protein, FPXTG motif_2                                         | 3 | 100.95 | 17.23491 | 16.20241 |
| 3-hydroxybutyryl-CoA dehydrogenase (EC1.1.1.157); 3-hydroxyacyl-CoA dehydrogenase (EC1.1.1.35) | 3 | 35.459 | 17.34343 | 16.21309 |

|                                                                                                  |    |        |          |          |
|--------------------------------------------------------------------------------------------------|----|--------|----------|----------|
| ABC transporter, substrate-binding protein PebA (cluster3,basicaa/glutamine/opines)              | 4  | 30.522 | 17.40041 | 17.88626 |
| Phosphate acetyltransferase (EC2.3.1.8)                                                          | 3  | 35.877 | 17.40831 | 15.14629 |
| Laminin-binding surface protein                                                                  | 3  | 34.168 | 17.46348 | 16.24685 |
| Transposase TnpA_2                                                                               | 3  | 22.289 | 17.70144 | 18.50742 |
| Glycosyltransferase,group 2 familyprotein; Possible alpha-rhamnosyltransferase, RhaT (EC2.4.1.-) | 3  | 35.925 | 17.74255 | 14.40421 |
| Purine nucleoside ABC transporter, substrate-binding protein                                     | 7  | 36.128 | 17.78040 | 17.18069 |
| Phage major capsid protein                                                                       | 3  | 45.421 | 17.84083 | 16.88929 |
| LPXTG cell wall anchor domain-containing protein_7                                               | 4  | 33.189 | 17.87454 | 15.23586 |
| Ribosome small subunit biogenesis RbfA-release protein RsgA                                      | 3  | 33.422 | 17.93243 | 17.15896 |
| GTP-binding protein EngA                                                                         | 3  | 48.984 | 18.14808 | 17.59397 |
| Predicted regulator for deoxynucleoside utilization, GntR family                                 | 3  | 27.811 | 18.40175 | 15.73307 |
| Polysaccharide biosynthesis glycosyltransferase CpsJ                                             | 4  | 37.256 | 18.41159 | 16.82625 |
| LPXTG cell wall anchor domain-containing protein_8                                               | 4  | 15.812 | 18.86006 | 16.43249 |
| C5a peptidase precursor (EC3.4.21.-)                                                             | 6  | 86.929 | 19.22783 | 19.97421 |
| Phosphate acetyltransferase (EC2.3.1.8)                                                          | 5  | 35.877 | 19.30624 | 19.56037 |
| SAM-dependent methyltransferase HI 0095 (UbiEparalog)                                            | 4  | 28.304 | 19.39402 | 20.60187 |
| Nickel ABC transporter, periplasmic nickel-binding protein NikA (TC3.A.1.5.3)                    | 3  | 61.536 | 19.98954 | 18.75532 |
| Site-specific recombinase                                                                        | 4  | 62.865 | 20.0446  | 18.7713  |
| Cell surface protein_2                                                                           | 12 | 118.03 | 20.32608 | 19.49348 |
| NAD-dependent glyceraldehyde-3-phosphate dehydrogenase (EC1.2.1.12)                              | 13 | 36.005 | 21.11299 | 20.96719 |
| LPXTG cell wall anchor domain-containing protein_9                                               | 3  | 21.983 | 21.30341 | 21.70696 |

|                                                                                    |   |        |          |          |
|------------------------------------------------------------------------------------|---|--------|----------|----------|
| LSU ribosomal protein L5p (L11e)                                                   | 4 | 19.814 | 21.69982 | 21.76065 |
| Putative oxidoreductase                                                            | 3 | 48.004 | -        | 12.36791 |
| Efflux ABC transporter, ATP-binding protein                                        | 4 | 26.330 | -        | 13.83269 |
| Bacteriocin transport accessory protein, putative                                  | 3 | 14.068 | -        | 14.08647 |
| Alpha-L-Rhaalpha-1,3-L-rhamnosyltransferase (EC2.4.1.-)                            | 3 | 36.784 | -        | 14.76570 |
| Ribose ABC transport system, periplasmic ribose-binding protein RbsB (TC3.A.1.2.1) | 3 | 34.053 | -        | 14.81633 |
| Cell wall surface anchor family protein_5                                          | 3 | 56.387 | -        | 14.98611 |
| Ribonuclease J1 (endonuclease and 5'-exonuclease)                                  | 3 | 60.926 | -        | 15.41396 |
| Hypothetical protein_1                                                             | 3 | 43.766 | -        | 15.69794 |
| 5-formyltetrahydrofolate cyclo-ligase (EC6.3.3.2)                                  | 3 | 20.166 | -        | 16.22530 |
| Dihydrofolate reductase (EC1.5.1.3)                                                | 4 | 18.943 | -        | 17.87855 |
| SSU ribosomal protein S8 p (S15Ae)                                                 | 3 | 14.785 | -        | 18.22717 |
| Asparaginyl-tRNA synthetase (EC6.1.1.22)                                           | 3 | 51.152 | 11.97728 | -        |
| Hypothetical protein_1                                                             | 3 | 74.032 | 12.69183 | -        |
| C5a peptidase precursor (EC3.4.21.-)                                               | 3 | 86.929 | 14.04414 | -        |
| Iron compound ABC uptake transporter substrate-binding protein                     | 3 | 37.72  | 14.30969 | -        |
| Neutral endopeptidase (EC3.4.24.-)                                                 | 3 | 31.438 | 15.29397 | -        |
| Ribonucleotide reductase of class Ib (aerobic), beta-subunit (EC1.17.4.1)          | 3 | 38.858 | 15.49953 | -        |
| GTP-binding protein YqeH, required for biogenesis of 30S ribosome subunit          | 3 | 41.675 | 15.61347 | -        |
| UDP-N-acetylmuramoyl pentapeptide-lysineN(6)-alanyl transferase (EC2.3.2.10)       | 6 | 46.825 | 16.09414 | -        |
| Transcriptional regulator, AcrR family                                             | 3 | 21.032 | 16.34676 | -        |

Na<sup>+</sup>/H<sup>+</sup> antiporter

3

77.922

19.13114

-

36

37



38 **S3: Ramachandran plot of chimeric-multipitope protein vaccine predicted by**  
 39 **PROCHECK.** The plot of (A) 45F2 model indicated that 90.3%, , 8.5%, 0.7% and 0.7% of  
 40 amino acid residues were located in most favored regions [A,B,L], additional allowed regions  
 41 [a,b,l,p], generously allowed regions [ $\sim$ a, $\sim$ b, $\sim$ l, $\sim$ p] and disallowed regions, respectively.  
 42 While, the plot of (B) 42E2 zodel was represented at 83.0%, 11.6%, 4.8% and 0.7%,  
 43 respectively.

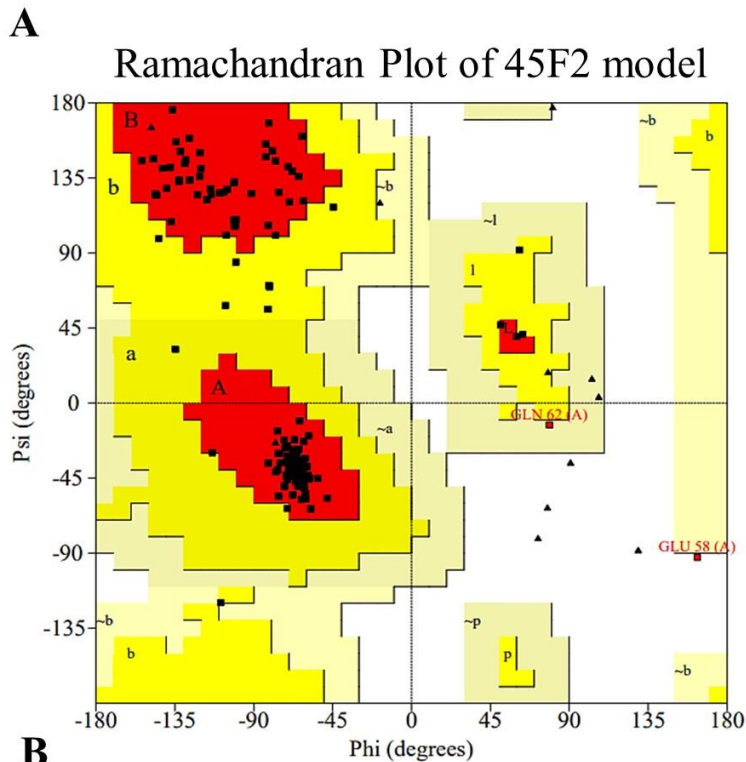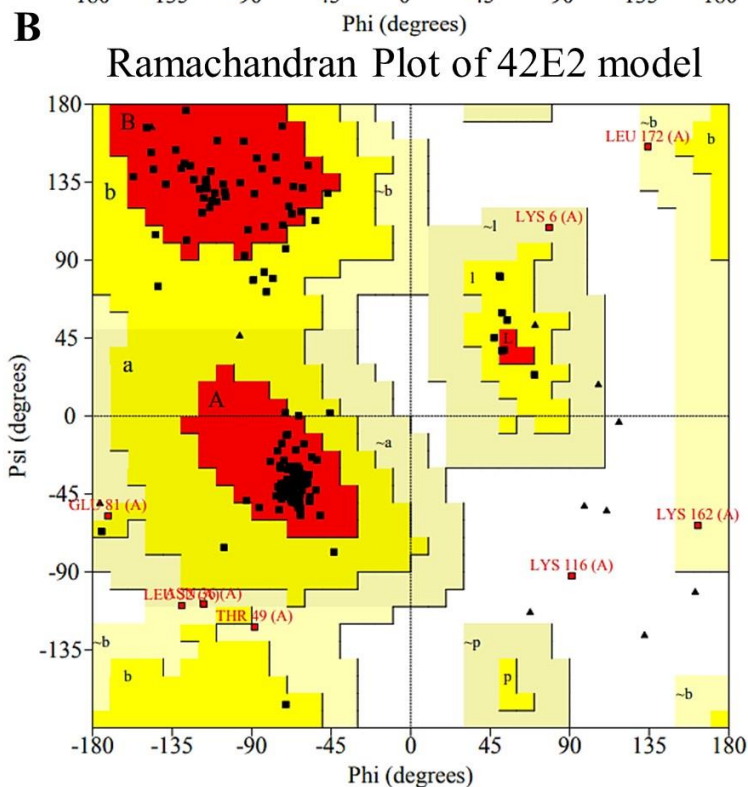

64 **S4: Histogram of the codon-optimized chimeric-multiepitope 45F2 and 42E2.** The codon  
 65 quality distribution and codon quality plot of 45F2 (A-B) and 42E2 (C-D) showed percentage  
 66 of codon that fell into a certain quality class. The CAI of 45F2 and 42E2 optimized gene are  
 67 0.92 and 0.93, respectively. The quality class means the CAI parameter >0.9 and equal 1  
 68 were considered as very good and perfect matching the codon usage preference of the target  
 69 organism. The quality value of the most frequently used codon for a given amino acid in the  
 70 desired the expression system is set to 100; codons with values less than 30 seem to diminish  
 71 potential expression. The plots demonstrate the quality of the used codon at the indicated  
 72 codon position. (E) and (F) represent GC content plots of 45F2 and 42E2 in a 40 bp window  
 73 centered at the indicated nucleotide position. The ideal range of GC content should be in  
 74 between 30% to 70%.

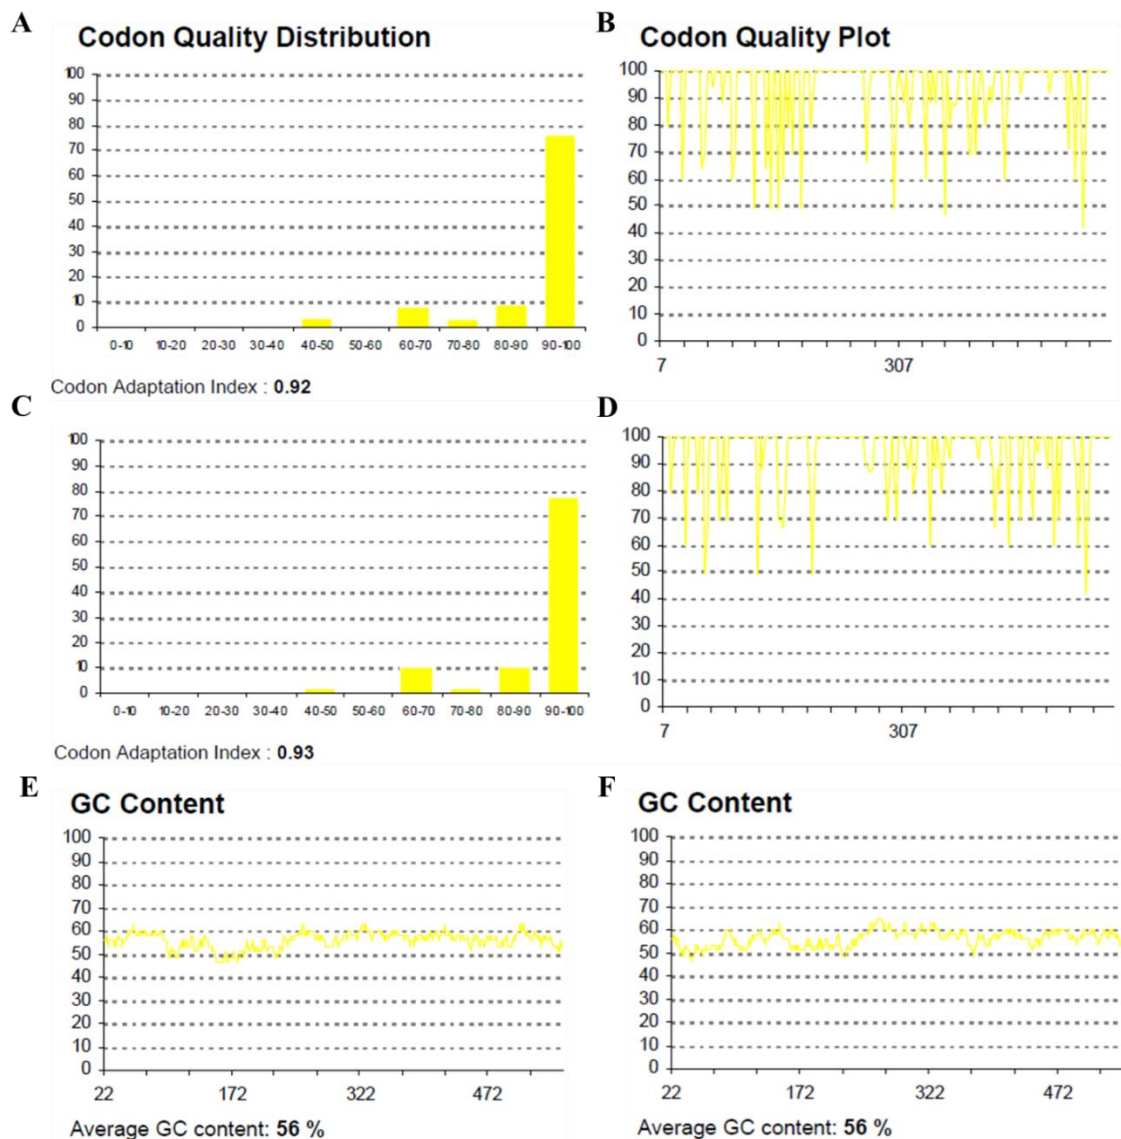

75

76

77

78

79 **S5: The MFE secondary structure of chimeric-multipitope vaccine candidates, 45F2**  
80 **(A) and 42E2 (B).** Regarding to base-pairing probabilities, the structure is colored by base-  
81 pairing probabilities. For unpaired regions, the color denotes the probability of being  
82 unpaired<sup>51</sup>. The MFE of 45E2 and 42E2 constructs represented the free energy of  
83 thermodynamic ensemble at -191.44 kcal/mol and -181.16 kcal/mol, respectively.

84

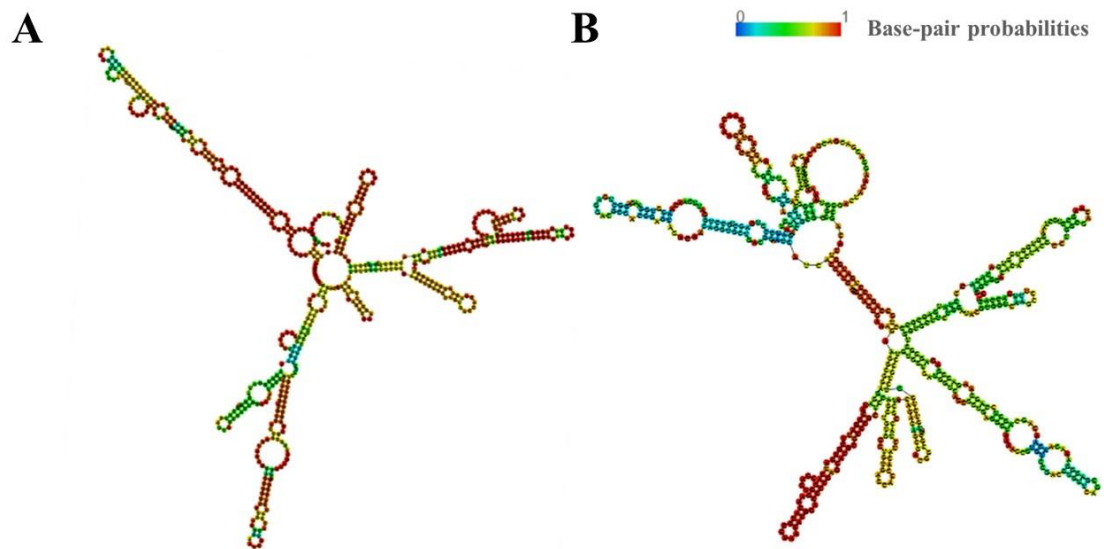

85

86

87

88

89

90

91

92

93

94

95

96

97

98 **S6: Table of fish mortality during post-challenge for 21 days.** The experimental groups  
 99 were comprised of pcDNA3.1 as negative control, FKC as positive control, chimeric-  
 100 multiepitope protein vaccine (42E2 and 45F2), as well as chimeric-multiepitope DNA  
 101 vaccine (42E2 and 45F2) groups. #1, #2, and #3 indicated each replicate (n=10) of each  
 102 treatment.

103 \*The data were represented as cumulative mortality percentage in figure 6A.

| Date / Group      | 1 | 3 | 5 | 7 | 9 | 11 | 13 | 15 | 17 | 19 | 21 |
|-------------------|---|---|---|---|---|----|----|----|----|----|----|
| pcDNA3.1 (#1)     | 0 | 0 | 4 | 4 | 6 | 6  | 6  | 7  | 7  | 7  | 8  |
| pcDNA3.1 (#2)     | 0 | 1 | 5 | 5 | 5 | 5  | 5  | 5  | 6  | 6  | 6  |
| pcDNA3.1 (#3)     | 0 | 2 | 4 | 5 | 6 | 6  | 6  | 6  | 7  | 7  | 7  |
| FKC (#1)          | 0 | 1 | 1 | 1 | 1 | 1  | 1  | 1  | 1  | 2  | 2  |
| FKC (#2)          | 0 | 0 | 0 | 0 | 0 | 0  | 0  | 0  | 0  | 0  | 0  |
| FKC (#3)          | 0 | 1 | 2 | 2 | 2 | 2  | 2  | 2  | 2  | 2  | 3  |
| 42E2 protein (#1) | 0 | 0 | 2 | 2 | 2 | 2  | 2  | 2  | 2  | 2  | 2  |
| 42E2 protein (#2) | 0 | 1 | 2 | 2 | 3 | 3  | 3  | 3  | 3  | 3  | 3  |
| 42E2 protein (#3) | 0 | 1 | 2 | 2 | 2 | 2  | 2  | 2  | 2  | 2  | 2  |
| 45F2 protein (#1) | 0 | 0 | 1 | 1 | 1 | 1  | 1  | 1  | 1  | 1  | 2  |
| 45F2 protein (#2) | 0 | 0 | 2 | 3 | 4 | 4  | 4  | 4  | 4  | 4  | 4  |
| 45F2 protein (#3) | 0 | 0 | 2 | 2 | 3 | 3  | 3  | 3  | 3  | 3  | 3  |
| 42E2 DNA (#1)     | 0 | 0 | 0 | 0 | 0 | 0  | 0  | 0  | 0  | 0  | 0  |
| 42E2 DNA (#2)     | 0 | 2 | 3 | 3 | 3 | 3  | 3  | 3  | 3  | 3  | 3  |
| 42E2 DNA (#3)     | 0 | 0 | 0 | 1 | 2 | 2  | 2  | 2  | 2  | 2  | 2  |
| 45F2 DNA (#1)     | 0 | 0 | 1 | 1 | 2 | 2  | 2  | 2  | 2  | 2  | 2  |
| 45F2 DNA (#2)     | 0 | 0 | 1 | 1 | 1 | 1  | 1  | 1  | 1  | 1  | 1  |
| 45F2 DNA (#3)     | 0 | 0 | 2 | 2 | 2 | 2  | 2  | 2  | 2  | 2  | 2  |

104  
 105  
 106  
 107  
 108  
 109  
 110  
 111  
 112

113 **S7: Bacterial isolation and clinical signs of challenged tilapia after challenge with *S.***  
114 ***agalactiae*.** Figure (A) represented PCR results of isolated bacteria from moribund fish after  
115 challenge. (M = VC 100 bp Plus DNA ladder, N = Negative, Ia and III = positive control of  
116 *S. agalactiae* serotypes Ia and III, 1-13 = Isolated bacteria from challenged fish). Figure (B)  
117 showed clinical signs of challenged fish. The left figure showed opaque eye (blue arrow) and  
118 the right figure showed abscess (yellow arrow).

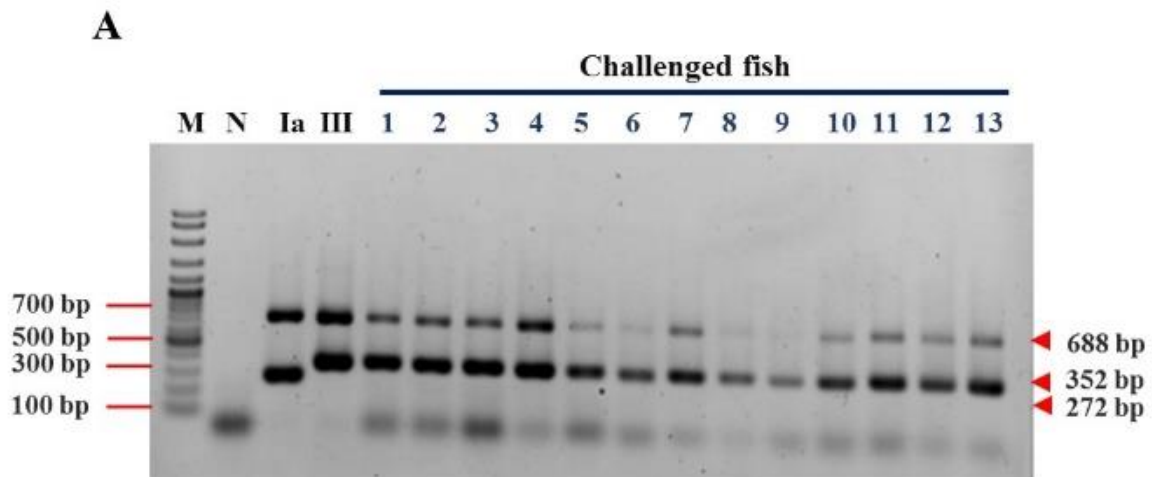

**B**

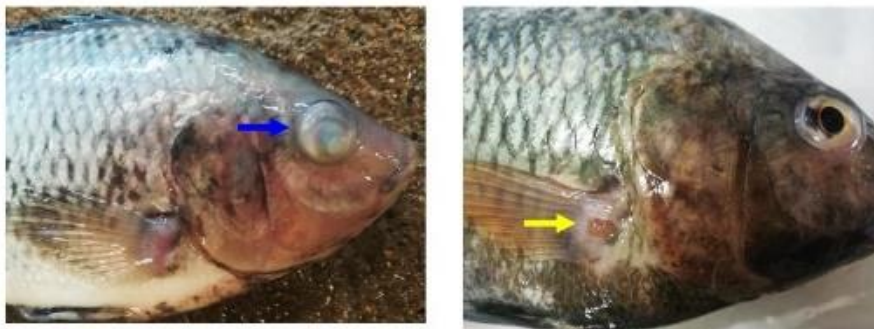

119

120

121

122

123

124

125

126

127 **S8: Dot blot analysis of sera from fish immunized by pCDNA3.1 (control), chimeric**  
128 **recombinant protein vaccine 42E2 and 45F2 against whole cell *S. agalactiae* lysate**  
129 **serotype Ia and III.**

130

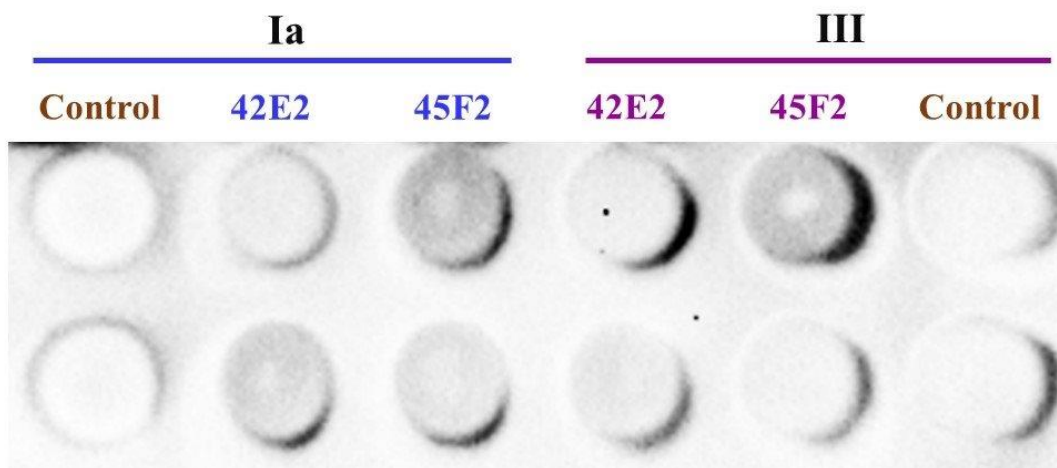

131

132

133 S9: Diagram of experimental designs for vaccine efficacy analysis.

134

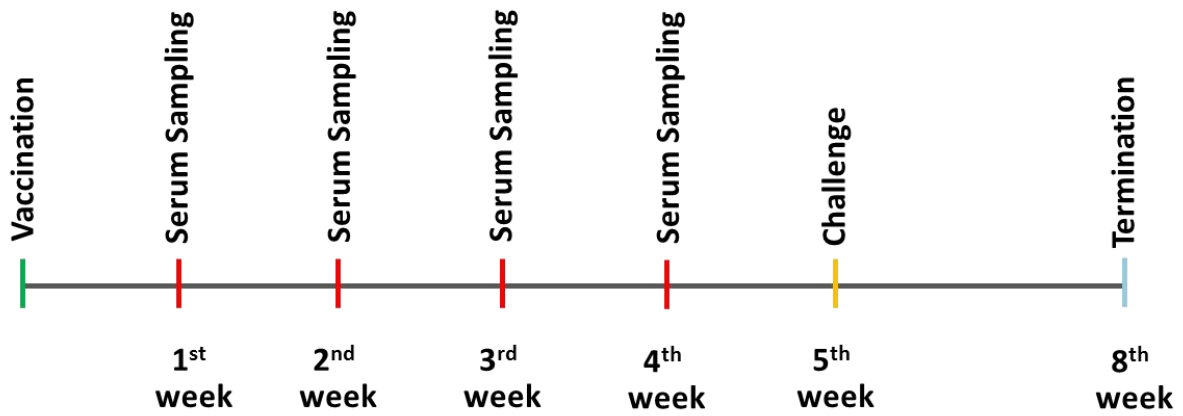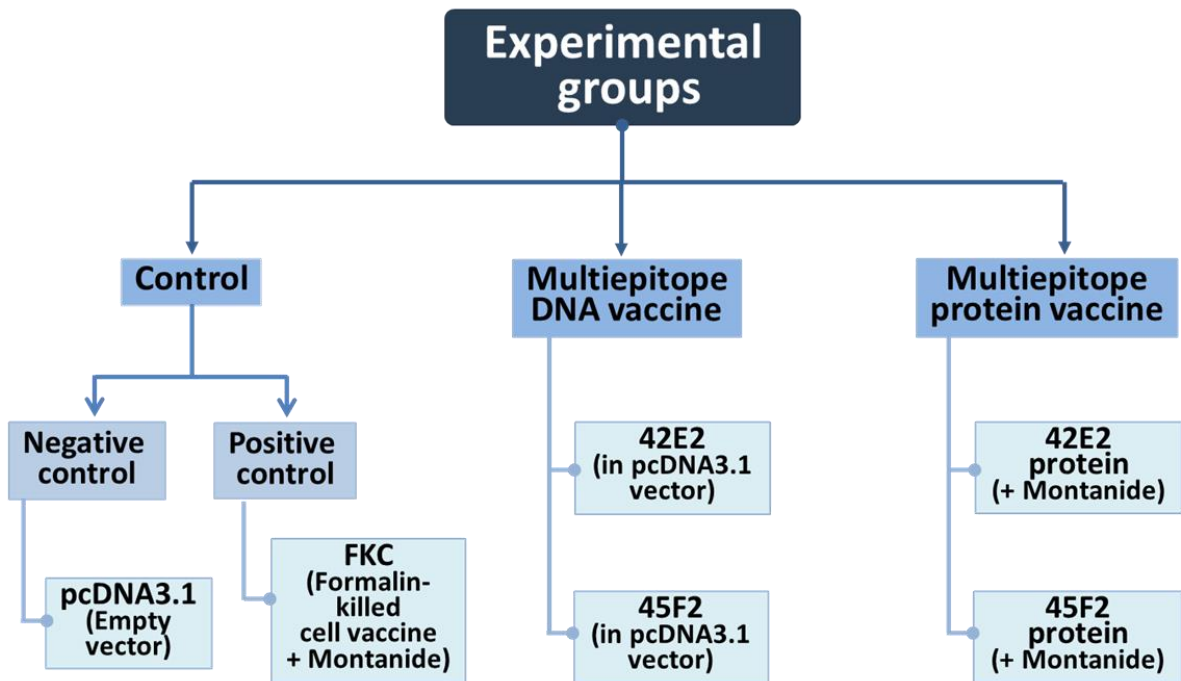

135

136
